# Supplementary material
Source: publisher site journal article supplement (https://www.dovepress.com/article/560787)
Supplement: Supplementary file 1 [file 560787.docx]

Supplement table 1 MR method result of the SNP of the FABP4

| Variables | MR method | Number of SNPs | Beta | SE | OR | 95% confidence interval | Association P‐value | Cochran Q statistic | I2 | Heterogeneity *P*‐value |
| --- | --- | --- | --- | --- | --- | --- | --- | --- | --- | --- |
| FABP4 | Inverse variance weighted | 2 | 0.0396 | 0.0141 | 1.0404 | 1.0121-1.0695 | 0.0049* | 0.9082 | 0.1011 | 0.3406 |

*FABP4, Fatty acid-binding protein 4, PCSK9, proprotein convertase subtilisin/kexin type 9, PTX3, pentraxin 3, LXA4, Lipoxin A4, LL-37, Antimicrobial peptide, RVD, Resolvin D1.*

**p＜0.05*

Supplement Table 2. Correlation coefficients between baseline lipids biomarkers in primary prevention, statin‐treated cohort

|  | FABP4 | PCSK9 | RVD | HDL-C | LDL-C | Triglycerides | TC | LPA | TC/HDL-C |
| --- | --- | --- | --- | --- | --- | --- | --- | --- | --- |
| PCSK9 | 0.0349* |  |  |  |  |  |  |  |  |
| RVD | -0.1089 | -0.0581 |  |  |  |  |  |  |  |
| HDL-C | 0.0803 | -0.0694 | -0.0024* |  |  |  |  |  |  |
| LDL-C | 0.0126* | -0.0415 | 0.0520 | 0.1206 |  |  |  |  |  |
| Triglycerides | 0.0191* | 0.1449 | 0.1051 | -0.2136 | 0.1458 |  |  |  |  |
| TC | 0.0512 | 0.0018* | 0.0604 | 0.2386 | 0.9046 | 0.3530 |  |  |  |
| LPA (g/L) | 0.0794 | 0.0255* | -0.0744 | 0.0770 | 0.0902 | -0.0661 | 0.0806 |  |  |
| TC/HDL-C | -0.0535 | 0.0129* | 0.0428 | -0.4191 | 0.8119 | 0.2342 | 0.6729 | 0.0378* |  |
| LDL-C/HDL-C | -0.0356* | 0.0686 | 0.0526 | -0.5246 | 0.6446 | 0.4758 | 0.6586 | 0.0036* | 0.9094 |

***Abbreviations:*** *HDL, high density lipoprotein; LDL, low density lipoprotein; LPA, lipoprotein a; TC/HDL-C, ratio of total cholesterol and high-density cholesterol; LDL-C/HDL-C ,ratio of low-density lipoprotein to high-density cholesterol; FABP4, Fatty acid-binding protein 4, PCSK9, proprotein convertase subtilisin/kexin type 9, RVD, Resolvin D1.*

**p＜0.05*

Supplement table3 Associations between MACE stratified according to number of increased lipid parameters and risk factors among patients with DM

| Subgroup | Variable | Total/N | Event/N(%) | Crude HR(95%CI) | Crude *P* value | Adjusted HR (95%CI) | Adjusted *P* value | *P* for interaction 1 | *P* for interaction 2 |
| --- | --- | --- | --- | --- | --- | --- | --- | --- | --- |
| TyG＜median |  |  |  |  |  |  |  | 0.136 | 0.733 |
|  | Group1a | 15 | 7 (46.7) | 1(Ref) |  | 1(Ref) |  |  |  |
|  | Group2b | 94 | 22 (23.4) | 0.46(0.20-1.08) | 0.076 | 0.31 (0.12-0.81) | 0.017* |  |  |
|  | Group3c | 47 | 19 (40.4) | 0.92 (0.39-2.20) | 0.855 | 0.65 (0.24-1.78) | 0.399 |  |  |
|  | Group4d | 6 | 3 (50) | 1.26 (0.32-4.87) | 0.740 | 0.72 (0.13-4.05) | 0.707 |  |  |
|  | Trend.test | 162 | 51 (31.5) | 1.30 (0.87-1.96) | 0.204 | 1.10 (0.68-1.80) | 0.694 |  |  |
| TyG≥median |  |  |  |  |  |  |  |  |  |
|  | Group1 | 10 | 3 (30) | 1(Ref) |  | 1(Ref) |  |  |  |
|  | Group2 | 129 | 41 (31.8) | 0.98 (0.30-3.17) | 0.977 | 0.59 (0.17-2.04) | 0.406 |  |  |
|  | Group3 | 178 | 52 (29.2) | 0.91 (0.28-2.91) | 0.872 | 0.54 (0.16-1.83) | 0.321 |  |  |
|  | Group4 | 64 | 25 (39.1) | 1.20 (0.36-3.97) | 0.769 | 0.67 (0.19-2.39) | 0.534 |  |  |
|  | Trend.test | 381 | 121 (31.8) | 1.07 (0.84-1.35) | 0.590 | 0.99 (0.76-1.29) | 0.944 |  |  |
| Male |  |  |  |  |  |  |  | 0.042* | 0.324 |
|  | Group1 | 20 | 9 (45) | 1(Ref) |  | 1(Ref) |  |  |  |
|  | Group2 | 167 | 41 (24.6) | 0.48 (0.23-0.98) | 0.045* | 0.27 (0.12-0.59) | 0.001* |  |  |
|  | Group3 | 171 | 55 (32.2) | 0.68 (0.33-1.37) | 0.277 | 0.42 (0.19-0.90) | 0.026* |  |  |
|  | Group4 | 49 | 18 (36.7) | 0.72 (0.32-1.61) | 0.423 | 0.51 (0.21-1.21) | 0.124 |  |  |
|  | Trend.test | 407 | 123 (30.2) | 1.11 (0.88-1.40) | 0.391 | 1.11 (0.85-1.46) | 0.443 |  |  |
| Female |  |  |  |  |  |  |  |  |  |
|  | Group1 | 5 | 1 (20) | 1(Ref) |  | 1(Ref) |  |  |  |
|  | Group2 | 56 | 22 (39.3) | 2.34(0.31-17.36) | 0.407 | 2.97 (0.31-28.06) | 0.342 |  |  |
|  | Group3 | 54 | 16 (29.6) | 1.61(0.21-12.16) | 0.643 | 1.15 (0.12-11.49) | 0.905 |  |  |
|  | Group4 | 21 | 10 (47.6) | 3.01 (0.38-23.5) | 0.294 | 1.22 (0.11-13.68) | 0.871 |  |  |
|  | Trend.test | 136 | 49 (36) | 1.10 (0.76-1.58) | 0.612 | 0.69 (0.42-1.14) | 0.151 |  |  |
| Without Current smoking |  |  |  |  |  |  |  | 0.405 | 0.664 |
|  | Group1 | 7 | 3 (42.9) | 1(Ref) |  | 1(Ref) |  |  |  |
|  | Group2 | 68 | 20 (29.4) | 0.61 (0.18-2.06) | 0.428 | 0.39 (0.10-1.51) | 0.172 |  |  |
|  | Group3 | 77 | 19 (24.7) | 0.49 (0.15-1.67) | 0.256 | 0.24 (0.06-0.97) | 0.045* |  |  |
|  | Group4 | 21 | 8 (38.1) | 0.84 (0.22-3.16) | 0.795 | 0.22 (0.03-1.44) | 0.114 |  |  |
|  | Trend.test | 173 | 50 (28.9) | 0.98 (0.67-1.43) | 0.907 | 0.63 (0.38-1.04) | 0.068 |  |  |
| Current smoking |  |  |  |  |  |  |  |  |  |
|  | Group1 | 18 | 7 (38.9) | 1(Ref) |  | 1(Ref) |  |  |  |
|  | Group2 | 154 | 43 (27.9) | 0.68 (0.30-1.50) | 0.338 | 0.37 (0.15-0.88) | 0.025* |  |  |
|  | Group3 | 145 | 52 (35.9) | 0.94 (0.43-2.08) | 0.885 | 0.62 (0.26-1.48) | 0.277 |  |  |
|  | Group4 | 49 | 20 (40.8) | 1.00 (0.42-2.37) | 0.997 | 0.75 (0.29-1.93) | 0.551 |  |  |
|  | Trend.test | 366 | 122 (33.3) | 1.16 (0.93-1.45) | 0.193 | 1.24 (0.95-1.63) | 0.118 |  |  |
| Without hypertension |  |  |  |  |  |  |  | 0.553 | 0.571 |
|  | Group1 | 7 | 4 (57.1) | 1(Ref) |  | 1(Ref) |  |  |  |
|  | Group2 | 48 | 12 (25) | 0.35 (0.11-1.09) | 0.070 | 0.39 (0.09-1.77) | 0.225 |  |  |
|  | Group3 | 75 | 16 (21.3) | 0.30 (0.10-0.90) | 0.032* | 0.30 (0.07-1.37) | 0.120 |  |  |
|  | Group4 | 22 | 8 (36.4) | 0.55 (0.17-1.85) | 0.337 | 0.90 (0.18-4.56) | 0.899 |  |  |
|  | Trend.test | 152 | 40 (26.3) | 0.93 (0.61-1.42) | 0.751 | 1.06 (0.62-1.81) | 0.825 |  |  |
| Hypertension |  |  |  |  |  |  |  |  |  |
|  | Group1 | 18 | 6 (33.3) | 1(Ref) |  | 1(Ref) |  |  |  |
|  | Group2 | 175 | 51 (29.1) | 0.86 (0.37-2.01) | 0.736 | 0.54 (0.22-1.31) | 0.174 |  |  |
|  | Group3 | 150 | 55 (36.7) | 1.16 (0.50-2.70) | 0.725 | 0.68 (0.28-1.66) | 0.392 |  |  |
|  | Group4 | 48 | 20 (41.7) | 1.23 (0.49-3.06) | 0.660 | 0.76 (0.29-2.03) | 0.586 |  |  |
|  | Trend.test | 391 | 132 (33.8) | 1.18 (0.95-1.47) | 0.137 | 1.11 (0.86-1.42) | 0.436 |  |  |
| Without stroke |  |  |  |  |  |  |  | 0.319 | 0.666 |
|  | Group1 | 18 | 7 (38.9) | 1(Ref) |  | 1(Ref) |  |  |  |
|  | Group2 | 174 | 40 (23) | 0.54 (0.24-1.20) | 0.128 | 0.40 (0.17-0.95) | 0.037* |  |  |
|  | Group3 | 184 | 52 (28.3) | 0.69 (0.31-1.52) | 0.354 | 0.61 (0.27-1.43) | 0.257 |  |  |
|  | Group4 | 55 | 19 (34.5) | 0.84 (0.35-20.0) | 0.696 | 0.62 (0.24-1.62) | 0.332 |  |  |
|  | Trend.test | 431 | 118 (27.4) | 1.13 (0.89-1.44) | 0.304 | 1.12 (0.86-1.47) | 0.388 |  |  |
| Stroke |  |  |  |  |  |  |  |  |  |
|  | Group1 | 6 | 3 (50) | 1(Ref) |  | 1(Ref) |  |  |  |
|  | Group2 | 49 | 23 (46.9) | 1.07 (0.32-3.61) | 0.907 | 0.59 (0.13-2.67) | 0.496 |  |  |
|  | Group3 | 41 | 19 (46.3) | 1.07 (0.32-3.63) | 0.910 | 0.39 (0.08-1.92) | 0.248 |  |  |
|  | Group4 | 15 | 9 (60) | 1.31 (0.35-4.89) | 0.686 | 0.80 (0.16-4.14) | 0.793 |  |  |
|  | Trend.test | 111 | 54 (48.6) | 1.08 (0.77-1.50) | 0.655 | 0.93 (0.59-1.47) | 0.764 |  |  |

Adjusted confounders include gender, age, current smoking, hypertension, hyperlipidemia, diabetes mellitus, stroke, white blood cell, hemoglobin, platelet, serum creatinine, fasting glucose, glycosylated hemoglobin, high sensitive C reactive protein, discharged medicine of Aspirin, Ticagrelor, Clopidogrel, ACEI&ARB, β blockers, statins, history of chronic renal disease, peripheral arteriosclerosis, history of myocardial infarction, history of coronary stent implantation, history of coronary artery bypass grafting, height, weight,heart rate, systolic blood pressure at baseline, diastolic blood pressure at baseline.

*p＜0.05

Supplement table 4 Associations between MACE stratified according to number of increased lipid parameters and risk factors among patients with non-DM

| Subgroup | Variable | Total/N | Event/N(%) | Crude HR(95%CI) | Crude *P* value | Adjusted HR (95%CI) | Adjusted  *P* value | *P* for interaction 1 | *P* for interaction 2 |
| --- | --- | --- | --- | --- | --- | --- | --- | --- | --- |
| TyG＜median |  |  |  |  |  |  |  | 0.804 | 0.617 |
|  | Group1 | 36 | 10 (27.8) | 1(Ref) |  | 1(Ref) |  |  |  |
|  | Group2 | 324 | 85 (26.2) | 0.97 (0.50-1.86) | 0.917 | 0.88 (0.43-1.79) | 0.725 |  |  |
|  | Group3 | 247 | 72 (29.1) | 1.12 (0.58-2.17) | 0.737 | 1.21 (0.59-2.47) | 0.609 |  |  |
|  | Group4 | 21 | 5 (23.8) | 0.96 (0.33-2.81) | 0.938 | 1.07 (0.35-3.27) | 0.905 |  |  |
|  | Trend.test | 628 | 172 (27.4) | 1.08 (0.86-1.36) | 0.514 | 1.19 (0.93-1.53) | 0.167 |  |  |
| TyG≥median |  |  |  |  |  |  |  |  |  |
|  | Group1 | 9 | 3 (33.3) | 1(Ref) |  | 1(Ref) |  |  |  |
|  | Group2 | 117 | 33 (28.2) | 0.82 (0.25-2.66) | 0.737 | 0.55 (0.15-2.05) | 0.377 |  |  |
|  | Group3 | 212 | 51 (24.1) | 0.70 (0.22-2.24) | 0.546 | 0.61 (0.17-2.22) | 0.456 |  |  |
|  | Group4 | 71 | 18 (25.4) | 0.77 (0.23-2.60) | 0.670 | 0.66 (0.17-2.53) | 0.540 |  |  |
|  | Trend.test | 409 | 105 (25.7) | 0.93 (0.71-1.22) | 0.607 | 1.03 (0.76-1.40) | 0.849 |  |  |
| Male |  |  |  |  |  |  |  | 0.954 | 0.882 |
|  | Group1 | 39 | 11 (28.2) | 1(Ref) |  | 1(Ref) |  |  |  |
|  | Group2 | 361 | 96 (26.6) | 0.96 (0.51-1.79) | 0.893 | 0.78 (0.40-1.53) | 0.472 |  |  |
|  | Group3 | 376 | 100 (26.6) | 0.98 (0.53-1.84) | 0.961 | 0.93 (0.48-1.82) | 0.835 |  |  |
|  | Group4 | 78 | 19 (24.4) | 0.92 (0.44-1.93) | 0.817 | 0.86 (0.39-1.89) | 0.703 |  |  |
|  | Trend.test | 854 | 226 (26.5) | 0.99 (0.83-1.19) | 0.940 | 1.05 (0.86-1.28) | 0.608 |  |  |
| Female |  |  |  |  |  |  |  |  |  |
|  | Group1 | 6 | 2 (33.3) | 1(Ref) |  | 1(Ref) |  |  |  |
|  | Group2 | 80 | 22 (27.5) | 0.76 (0.18-3.22) | 0.705 | 0.63 (0.09-4.35) | 0.642 |  |  |
|  | Group3 | 83 | 23 (27.7) | 0.76 (0.18-3.24) | 0.711 | 0.86 (0.12-6.08) | 0.878 |  |  |
|  | Group4 | 14 | 4 (28.6) | 0.87 (0.16-4.75) | 0.869 | 0.52 (0.05-5.51) | 0.586 |  |  |
|  | Trend.test | 183 | 51 (27.9) | 1.00 (0.66-1.51) | 0.994 | 1.04 (0.63-1.73) | 0.874 |  |  |
| Without current smoking | | | | | | | | | |
|  | Group1 | 11 | 5 (45.5) | 1(Ref) |  | 1(Ref) |  | 0.325 | 0.380 |
|  | Group2 | 132 | 37 (28) | 0.57 (0.22-1.45) | 0.235 | 0.73 (0.23-2.31) | 0.593 |  |  |
|  | Group3 | 122 | 31 (25.4) | 0.51 (0.20-1.31) | 0.159 | 0.61 (0.19-1.97) | 0.410 |  |  |
|  | Group4 | 23 | 5 (21.7) | 0.46 (0.13-1.58) | 0.214 | 0.51 (0.11-2.32) | 0.382 |  |  |
|  | Trend.test | 288 | 78 (27.1) | 0.83 (0.60-1.15) | 0.262 | 0.82 (0.56-1.19) | 0.295 |  |  |
| Current smoking | | | | | | | | | |
|  | Group1 | 33 | 8 (24.2) | 1(Ref) |  | 1(Ref) |  |  |  |
|  | Group2 | 305 | 79 (25.9) | 1.11 (0.54-2.3) | 0.779 | 0.77 (0.36-1.64) | 0.494 |  |  |
|  | Group3 | 336 | 92 (27.4) | 1.22 (0.59-2.52) | 0.585 | 1.02 (0.48-2.15) | 0.965 |  |  |
|  | Group4 | 69 | 18 (26.1) | 1.19 (0.52-2.74) | 0.683 | 0.97 (0.41-2.29) | 0.944 |  |  |
|  | Trend.test | 743 | 197 (26.5) | 1.07 (0.88-1.30) | 0.506 | 1.13 (0.91-1.40) | 0.256 |  |  |
| Without hypertension | | | | | | | | | |
|  | Group1 | 16 | 4 (25) | 1(Ref) |  | 1(Ref) |  | 0.485 | 0.440 |
|  | Group2 | 161 | 39 (24.2) | 0.98 (0.35-2.73) | 0.963 | 0.77 (0.25-2.30) | 0.635 |  |  |
|  | Group3 | 179 | 38 (21.2) | 0.82 (0.29-2.30) | 0.709 | 0.69 (0.23-2.10) | 0.515 |  |  |
|  | Group4 | 40 | 7 (17.5) | 0.69 (0.20-2.34) | 0.546 | 0.58 (0.15-2.20) | 0.424 |  |  |
|  | Trend.test | 396 | 88 (22.2) | 0.86 (0.64-1.15) | 0.306 | 0.87 (0.63-1.20) | 0.394 |  |  |
| Hypertension |  |  |  |  |  |  |  |  |  |
|  | Group1 | 29 | 9 (31) | 1(Ref) |  | 1(Ref) |  |  |  |
|  | Group2 | 280 | 79 (28.2) | 0.92 (0.46-1.84) | 0.818 | 0.74 (0.34-1.57) | 0.429 |  |  |
|  | Group3 | 280 | 85 (30.4) | 1.06 (0.53-2.10) | 0.874 | 0.96 (0.45-2.04) | 0.915 |  |  |
|  | Group4 | 52 | 16 (30.8) | 1.12 (0.50-2.55) | 0.778 | 1.07 (0.44-2.64) | 0.879 |  |  |
|  | Trend.test | 641 | 189 (29.5) | 1.09 (0.89-1.34) | 0.393 | 1.16 (0.92-1.46) | 0.205 |  |  |
| Without stroke |  |  |  |  |  |  |  | 0.462 | 0.991 |
|  | Group1 | 42 | 13 (31) | 1(Ref) |  | 1(Ref) |  |  |  |
|  | Group2 | 390 | 105 (26.9) | 0.87 (0.49-1.55) | 0.640 | 0.76 (0.41-1.40) | 0.379 |  |  |
|  | Group3 | 407 | 107 (26.3) | 0.87 (0.49-1.54) | 0.628 | 0.84 (0.46-1.56) | 0.587 |  |  |
|  | Group4 | 83 | 20 (24.1) | 0.82 (0.41-1.65) | 0.579 | 0.81 (0.39-1.70) | 0.580 |  |  |
|  | Trend.test | 922 | 245 (26.6) | 0.96 (0.81-1.15) | 0.681 | 1.02 (0.84-1.23) | 0.876 |  |  |
| Stroke |  |  |  |  |  |  |  |  |  |
|  | Group1 | 3 | 0 (0) | 1(Ref) |  | 1(Ref) |  |  |  |
|  | Group2 | 51 | 13 (25.5) | (0~Inf) | 0.997 | (0~Inf) | 0.999 |  |  |
|  | Group3 | 51 | 15 (29.4) | (0~Inf) | 0.997 | (0~Inf) | 0.999 |  |  |
|  | Group4 | 9 | 3 (33.3) | (0~Inf) | 0.997 | (0~Inf) | 0.999 |  |  |
|  | Trend.test | 114 | 31 (27.2) | 1.3 (0.78-2.16) | 0.323 | 2.14 (1.01-4.53) | 0.047 |  |  |

Adjusted confounders include gender, age, current smoking, hypertension, hyperlipidemia, diabetes mellitus, stroke, white blood cell, hemoglobin, platelet, serum creatinine, fasting glucose, glycosylated hemoglobin, high sensitive C reactive protein, discharged medicine of Aspirin, Ticagrelor, Clopidogrel, ACEI&ARB, β blockers, statins, history of chronic renal disease, peripheral arteriosclerosis, history of myocardial infarction, history of coronary stent implantation, history of coronary artery bypass grafting, height, weight,heart rate, systolic blood pressure at baseline, diastolic blood pressure at baseline.

**Supplement Figure 1**

| 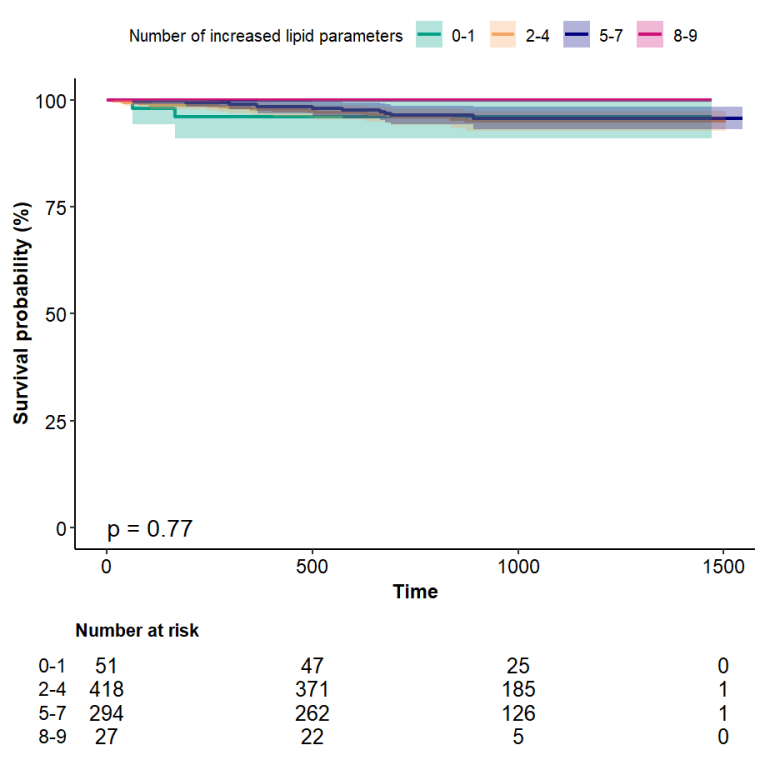 | 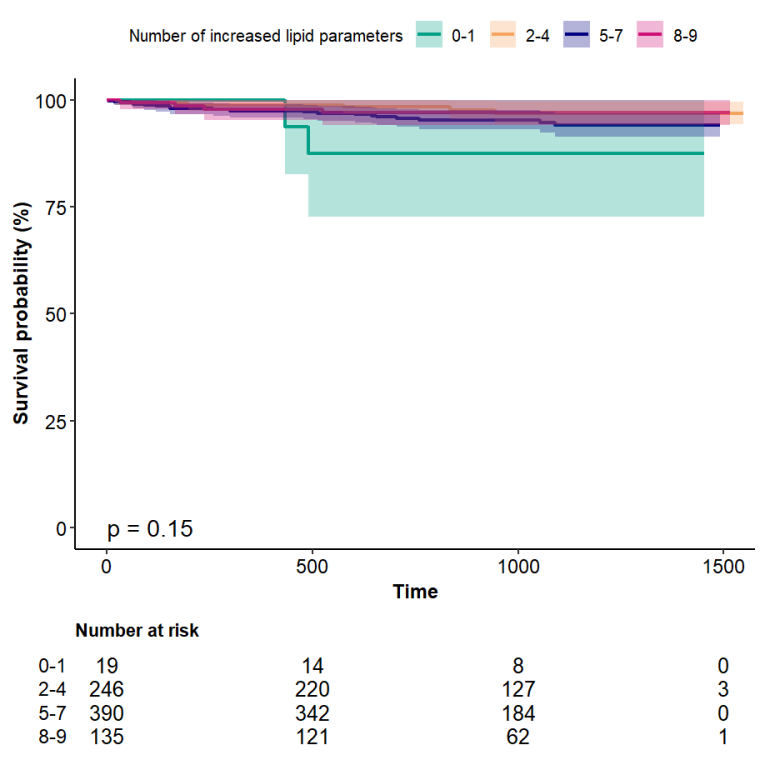 |
| --- | --- |
| Supplement Figure 1A | Supplement Figure 1B |
| 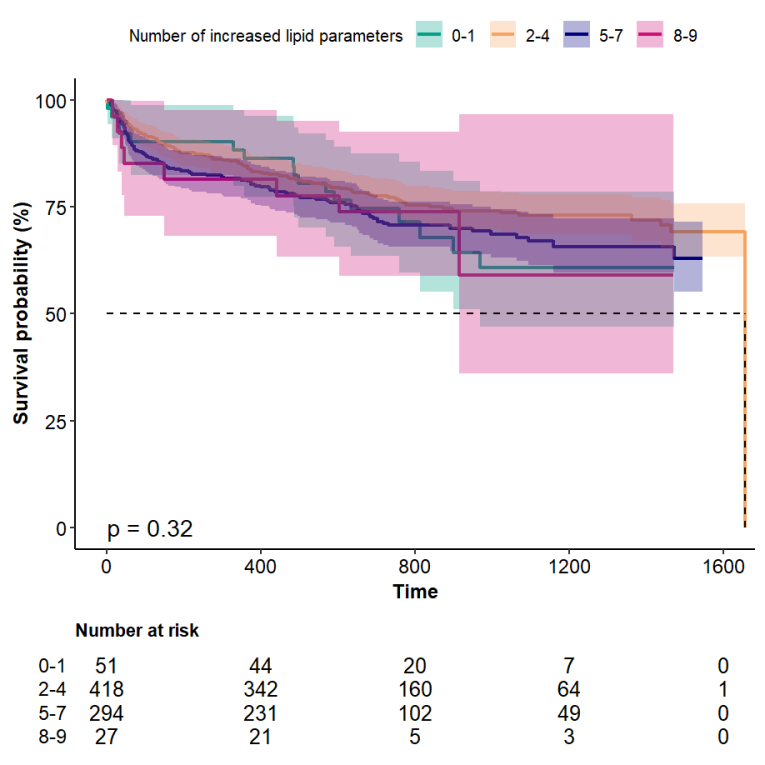 | 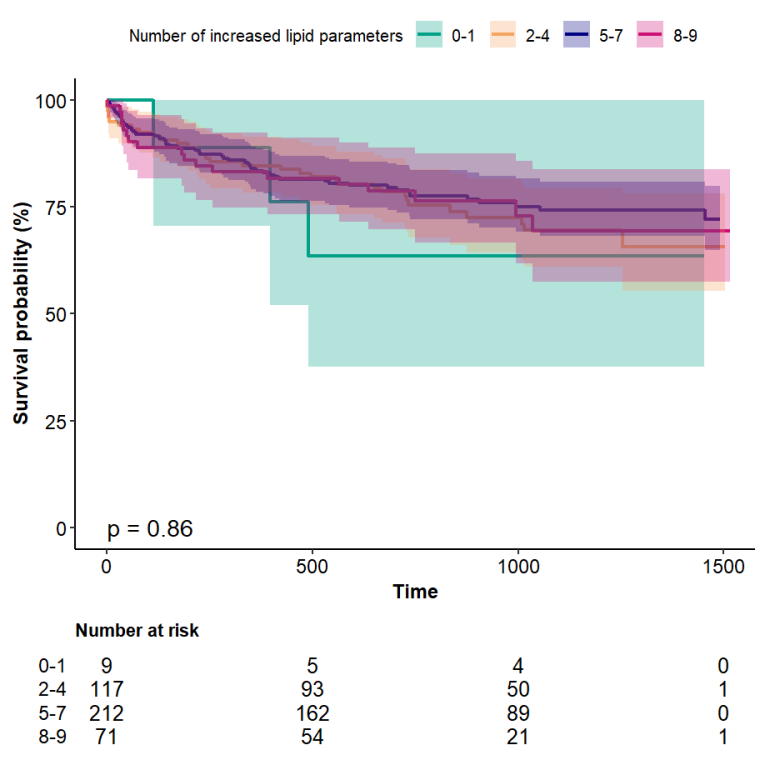 |
| Supplement Figure 1C | Supplement Figure 1D |

| 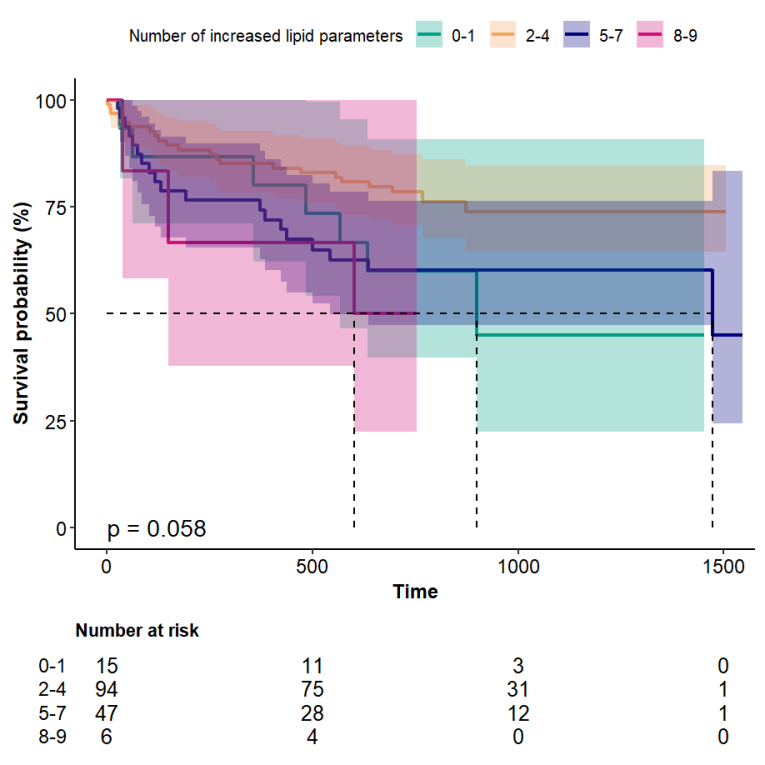 | 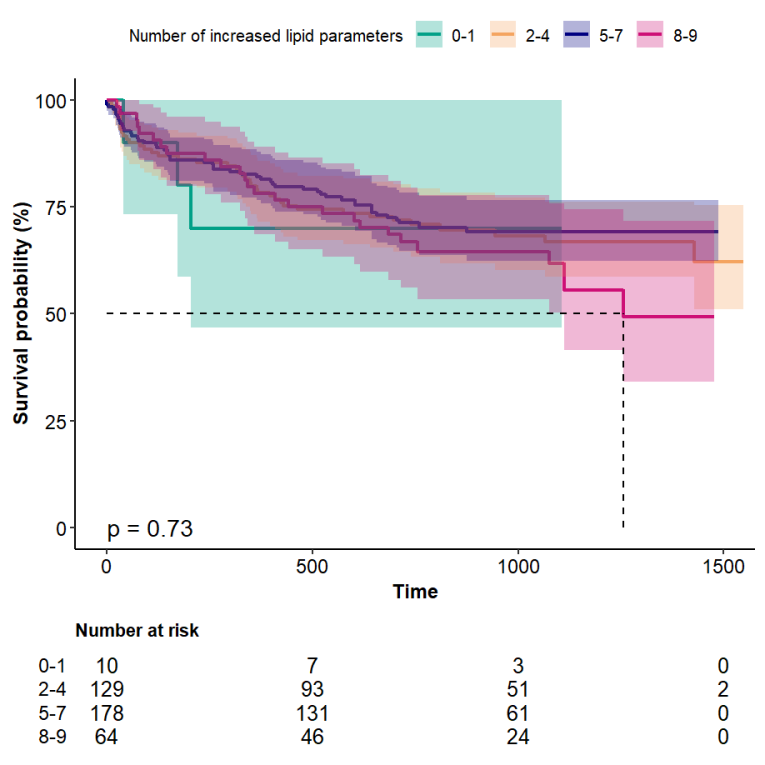 |
| --- | --- |
| Supplement Figure 1E | Supplement Figure 1F |

| 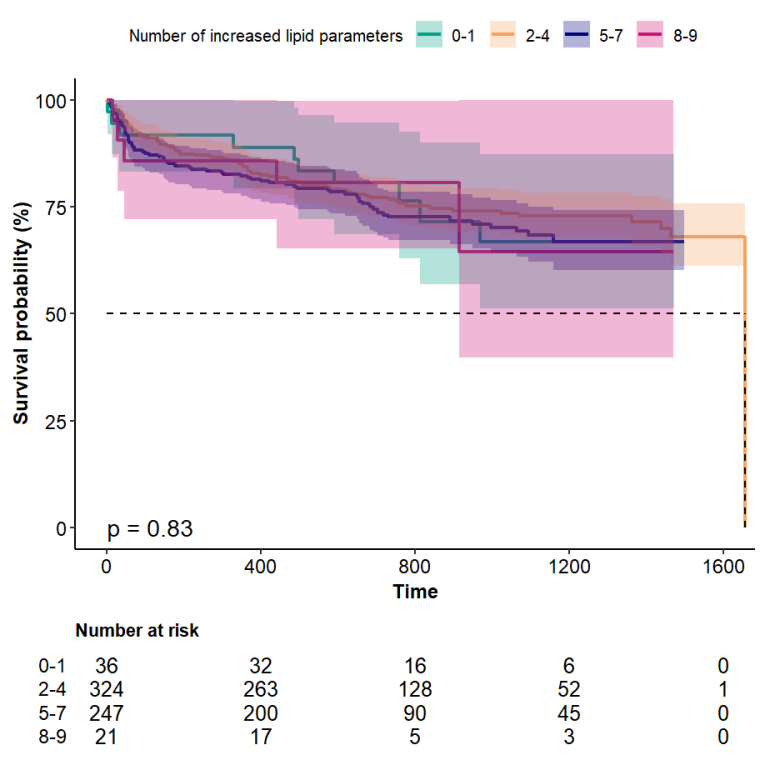 | 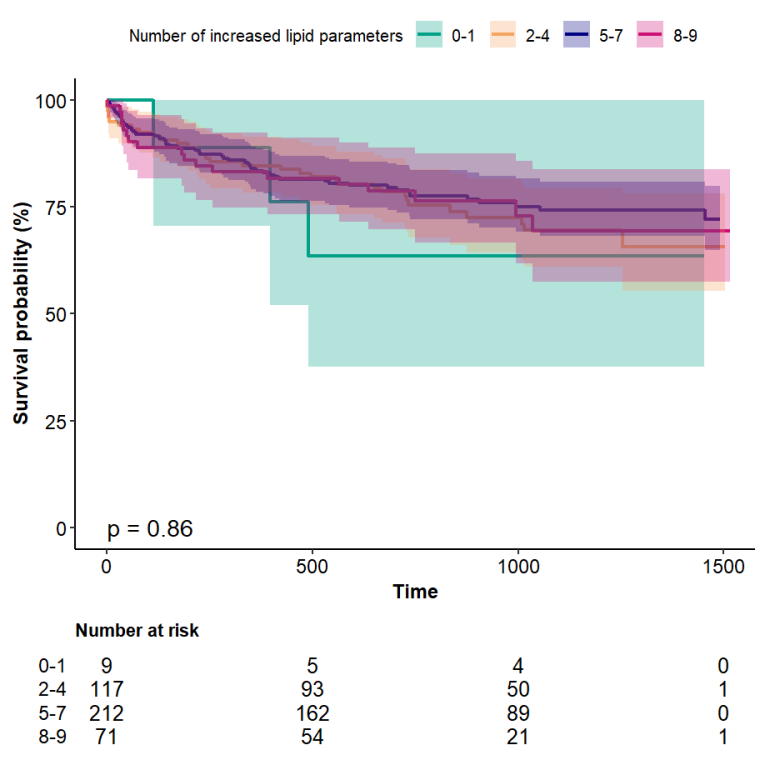 |
| --- | --- |
| Supplement Figure 1G | Supplement Figure 1H |

Kaplan-Meier curves showing cumulative stroke rates stratified by the number of increased lipid parameters among all enrolled when TyG＜median (**Supplement Figure 1A)** andTyG≥median (**Supplement Figure 1B)**. Kaplan-Meier curves showing cumulative MACE rates stratified by the number of increased lipid parameters among all enrolled when TyG＜median (**Supplement Figure 1C)** andTyG≥median (**Supplement Figure 1D)**. Kaplan-Meier curves showing cumulative MACE rates stratified by the number of increased lipid parameters among DM cohort when TyG＜median (**Supplement Figure 1E)** andTyG≥median (**Supplement Figure 1F)**. Kaplan-Meier curves showing cumulative MACE rates stratified by the number of increased lipid parameters among non-DM cohort when TyG＜median (**Supplement Figure 1G)** andTyG≥median (**Supplement Figure 1H)**.
